# Supplementary material
Source: PubMed Central journal article supplement (PMC5603816)

Ventral Striatum rCBF (Active)

70  
65  
60  
55

.008 .009 .010 .011 .012

Ventral Striatum Presynaptic Dopamine Synthesis Capacity (Ki)

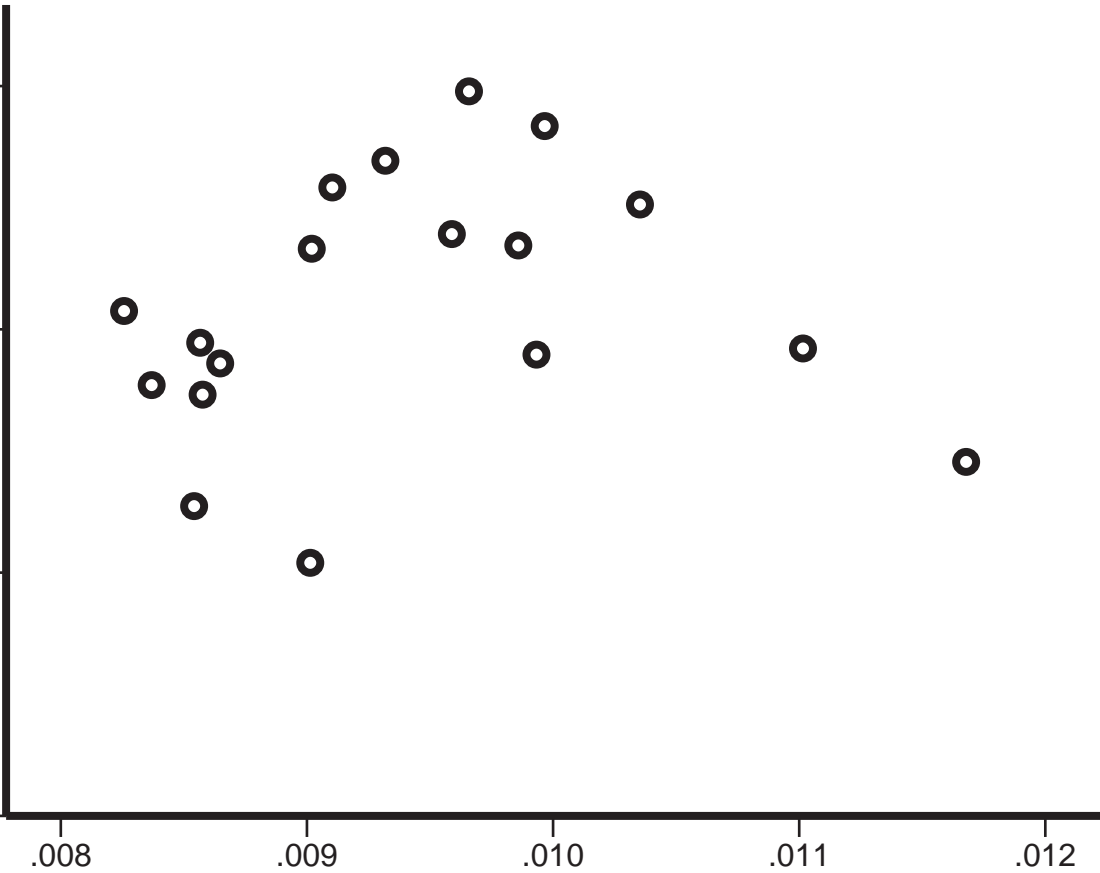

Supplement: npp201767x1.pdf [file npp201767x1.pdf]

Ventral Striatum rCBF (Placebo)

70

65

60

55

.008

.009

.010

.011

.012

Ventral Striatum Presynaptic Dopamine Synthesis Capacity (Ki)

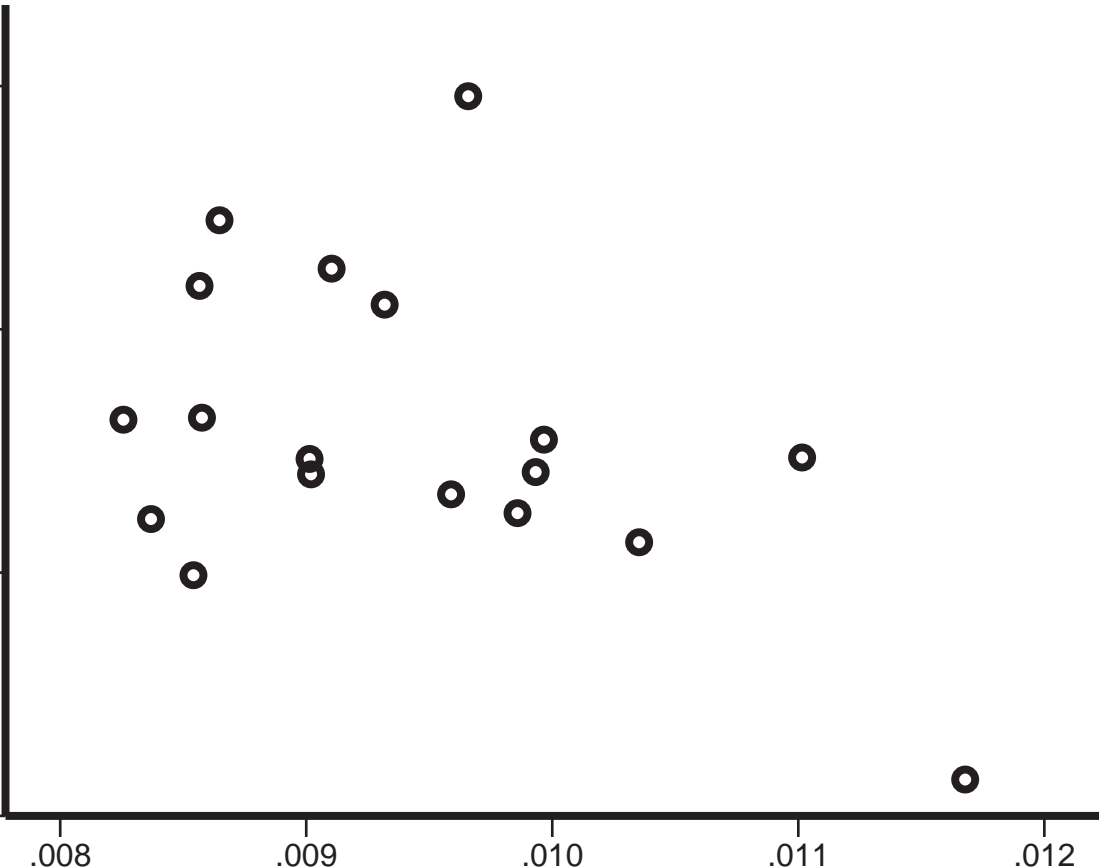

Supplement: npp201767x2.pdf [file npp201767x2.pdf]
